# Supplementary material for: Interaction between sleep quality and dietary inflammation on frailty: NHANES 2005–2008
Source: Royal Society of Chemistry journal article supplement (doi:10.1039/d2fo01832b), 2022-12-05
Supplement: d2fo01832b1.pdf [file d2fo01832b1.pdf]

**Supplementary Materials :**

**Interaction between Sleep Quality and Dietary inflammation on the Frailty:**

**NHANES 2005-2008**

Mengzi Sun<sup>1</sup>, Ling Wang<sup>1</sup>, Xuhan Wang<sup>1</sup>, Li Tong<sup>1</sup>, Jiabin Fang<sup>1</sup>, Yuxiang Wang<sup>1</sup>,

Yixue Yang<sup>1</sup>, Bo Li<sup>1,\*</sup>

<sup>1</sup>Department of Epidemiology and Biostatistics, School of Public Health, Jilin University, Changchun, 130021, P. R. China.

\*Corresponding author:

Bo Li: Department of Epidemiology and Biostatistics, School of Public Health, Jilin University, Changchun, 130021, P. R. China.

E-mail: li\_bo@jlu.edu.cn

Table S1. 36-item Frailty Index

| Self-reported Frailty Index items                  | Laboratory Frailty Index items                     |
|----------------------------------------------------|----------------------------------------------------|
| 1. Angina/angina pectoris                          | 26. Pulse rate (60-99 bpm)                         |
| 2. Heart attack                                    | 27. Systolic blood pressure (90-140 mmHg)          |
| 3. Coronary heart disease                          | 28. Pulse pressure (30-60 mmHg)                    |
| 4. Stroke                                          | 29. Platelet count SI (150-450 unit 1000 cells/mL) |
| 5. Thyroid condition                               | 30. Blood urea nitrogen (3-20 mg/dL)               |
| 6. Cancer                                          | 31. Bicarbonate ( $\leq 28$ mmol/L)                |
| 7. Arthritis                                       | 32. Red cell distribution width ( $\leq 14.6\%$ )  |
| 8. High blood pressure                             | 33. Lactate dehydrogenase ( $\leq 190$ U/L)        |
| 9. Diabetes mellitus                               | 34. Alkaline phosphatase ( $\leq 115$ U/L)         |
| 10. Weak/failing kidneys                           | 35. Uric acid (M: 240-510, F: 160-430 mmol/L)      |
| 11. Confusion or inability to remember things      | 36. Total calcium (2.0-2.5 mmol/L)                 |
| 12. Difficulty managing money                      |                                                    |
| 13. Difficulty stooping, crouching, kneeling       |                                                    |
| 14. Difficulty lifting or carrying                 |                                                    |
| 15. Difficulty walking between rooms on same floor |                                                    |
| 16. Difficulty standing up from an armless chair   |                                                    |
| 17. Difficulty getting in and out of bed           |                                                    |
| 18. Difficulty dressing yourself                   |                                                    |
| 19. Difficulty grasping/holding small objects      |                                                    |
| 20. Difficulty attending social events             |                                                    |
| 21. Self-reported health                           |                                                    |
| 22. Frequency of healthcare use                    |                                                    |
| 23. Health compared to 1 year ago                  |                                                    |
| 24. Overnight hospital stays                       |                                                    |
| 25. Medications                                    | □                                                  |

F = female; M = male

Table S2. Characteristics of participants with good and poor sleep quality (M(P<sub>25</sub>, P<sub>75</sub>)/N(%))

| □ □                                                   | Sleep quality          |                        | z/ $\chi^2$ | P                |
|-------------------------------------------------------|------------------------|------------------------|-------------|------------------|
|                                                       | Good(N=3814)           | Poor(N=5193)           |             |                  |
| DII (M(P <sub>25</sub> , P <sub>75</sub> ))           | -0.16(-1.60, 1.28)     | -0.07(-1.49, 1.50)     | 1.678       | 0.104            |
| Dietary inflammation (N(%))                           |                        |                        | 5.806       | 0.192            |
| Anti-inflammatory                                     | 1846(53.53)            | 2514(50.93)            |             |                  |
| Pro-inflammatory                                      | 1968(46.47)            | 2679(49.07)            |             |                  |
| Energy Intake (M(P <sub>25</sub> , P <sub>75</sub> )) | 2001.0(1514.0, 2570.0) | 1963.5(1503.0, 2571.5) | -0.813      | 0.423            |
| FI (M(P <sub>25</sub> , P <sub>75</sub> ))            | 0.15(0.11, 0.21)       | 0.17(0.11, 0.22)       | 10.194      | <b>&lt;0.001</b> |
| Frailty group (N(%))                                  |                        |                        | 71.579      | <b>&lt;0.001</b> |
| Fit                                                   | 2716(74.48)            | 3104(66.04)            |             |                  |
| Frailty                                               | 1098(25.52)            | 2089(33.96)            |             |                  |
| Sex (N(%))                                            |                        |                        | 112.261     | <b>&lt;0.001</b> |
| Male                                                  | 2143(54.84)            | 2257(43.39)            |             |                  |
| Female                                                | 1671(45.16)            | 2936(56.61)            |             |                  |
| Race (N(%))                                           |                        |                        | 56.217      | <b>&lt;0.001</b> |
| Non-Hispanic White                                    | 1654(67.08)            | 2776(74.40)            |             |                  |
| Other                                                 | 2160(32.92)            | 2417(25.60)            |             |                  |
| Age (M(P <sub>25</sub> , P <sub>75</sub> ))           | 45(33, 60)             | 45(32, 57)             | -2.111      | <b>0.043</b>     |
| Age group (N(%))                                      |                        |                        | 33.633      | <b>&lt;0.001</b> |
| 20~39                                                 | 1329(39.31)            | 1871(38.98)            |             |                  |
| 40~64                                                 | 1488(41.82)            | 2198(46.39)            |             |                  |
| 65~                                                   | 997(18.87)             | 1124(14.63)            |             |                  |
| BMI (M(P <sub>25</sub> , P <sub>75</sub> ))           | 27.62(24.25, 31.76)    | 27.43(23.93, 31.91)    | -0.929      | 0.360            |
| BMI group (N(%))                                      |                        |                        | 10.742      | 0.056            |
| Under & healthy weight                                | 1078(30.29)            | 1541(32.82)            |             |                  |
| Overweight                                            | 1410(35.53)            | 1719(32.47)            |             |                  |
| Obese                                                 | 1326(34.18)            | 1933(34.60)            |             |                  |
| Smoking status (N(%))                                 |                        |                        | 18.073      | 0.065            |
| Non-smoker                                            | 2079(53.20)            | 2637(50.87)            |             |                  |
| Current smoker                                        | 735(21.60)             | 1244(25.52)            |             |                  |
| Former smoker                                         | 1000(25.19)            | 1312(23.61)            |             |                  |
| Drinking status (N(%))                                |                        |                        | 12.548      | <b>0.024</b>     |
| Non-drinker                                           | 607(12.40)             | 670(10.04)             |             |                  |
| Current drinker                                       | 566(13.12)             | 842(13.95)             |             |                  |
| Former drinker                                        | 2641(74.48)            | 3681(76.01)            |             |                  |
| Physical exercise (N(%))                              |                        |                        | 8.010       | <b>0.030</b>     |
| Inactive                                              | 1795(38.59)            | 2214(35.63)            |             |                  |
| Active                                                | 2019(61.41)            | 2979(64.37)            | □           | □                |

Table S3. Logistic regression of frailty for dietary inflammation in the participants with poor sleep quality.

| □                   | Model 1 <sup>a</sup> |                  | □                | Model 2 <sup>b</sup> |                  | Model 3 <sup>c</sup> |              |
|---------------------|----------------------|------------------|------------------|----------------------|------------------|----------------------|--------------|
|                     | OR(95%CI)            | <i>P</i>         |                  | OR(95%CI)            | <i>P</i>         | OR(95%CI)            | <i>P</i>     |
| Subgroup 4 (N=2679) | 1.0 [Reference]      |                  | 1.0 [Reference]  |                      | 1.0 [Reference]  |                      |              |
| Subgroup 3 (N=2514) | 0.67(0.58, 0.77)     | <b>&lt;0.001</b> | 0.64(0.53, 0.77) | <b>&lt;0.001</b>     | 0.68(0.54, 0.86) |                      | <b>0.002</b> |

Subgroup 3 is anti-inflammatory diet & poor sleep quality; Subgroup 4 is pro-inflammatory diet & poor sleep quality.

<sup>a</sup> Model 1 without adjustments;

<sup>b</sup> Model 2 additionally adjusted for Gender (Male, Female), Age (year), Race (Non-Hispanic White, Other), BMI (kg/m<sup>2</sup>);

<sup>c</sup> Model 3 additionally adjusted for Energy intake (kCal), Smoking status (Non-smoker, Current smoker, Former-smoker), Drinking status (Non-drinker, Current drinker, Former-drinker) and Physical exercise (Inactive, Active).
